# Supplementary material for: Collision induced dissociation of doubly-charged ions: Coulomb explosion vs. neutral loss in [Ca(urea)]2+ gas phase unimolecular reactivity via chemical dynamics simulations
Source: Royal Society of Chemistry journal article supplement (doi:10.1039/c2cp41379e), 2012-01-01
Supplement: c2cp41379e.pdf [file c2cp41379e.pdf]

# Collision Induced Dissociation of Doubly-charged Ions: Coulomb Explosion vs Neutral Loss in $[\text{Ca}(\text{urea})]^{2+}$ Gas Phase Reactivity via Chemical Dynamics Simulations

*Riccardo Spezia, Alvaro Cimas, Marie-Pierre Gaigeot, Jean-Yves Salpin, Kihyung Song and William H. Hase*

## Supporting Information

### Canonical kinetics

On the basis of Figure 4, the steady-state solution of the master equation leads to the microcanonical expression of the overall rate coefficient:

$$k_{\text{overall}} = k_a + k_b + k_c + k_d + k_e + k_f + k_g + k_h \quad (\text{S1})$$

where the individual coefficients for the different channels (*a*:  $\text{Ca}^{2+} + \text{H}_2\text{NCONH}_2$ , *b*:  $\text{CaNH}_2^+ + \text{H}_2\text{NCO}^+$ , *c*:  $\text{NH}_4^+ + \text{CaNCO}^+$ , *d*:  $\text{NH}_4^+ + \text{CaOCN}^+$ , *e*:  $\text{NH}_3 + \text{CaNHCO}^{2+}$ , *f*:  $\text{CaNH}_3^{2+} + \text{HNCO}$ , *g*:  $\text{NH}_3 + \text{CaOCNH}^{2+}$ , *h*:  $\text{CaO}^+ + \text{H}_2\text{NCNH}_2^+$ ) are given by the following formulas:

$$k_a = k_1$$

$$k_b = k_3 \frac{H}{G}$$

$$k_c = \frac{k_6}{C} \left[ \frac{k_4 H}{G} + k_{12} \left( \frac{k_{11}}{E} + \frac{k_{-12} k_4 H}{CEG} \right) \right]$$

$$k_d = \frac{k_5}{C} \left[ \frac{k_4 H}{G} + k_{12} \left( \frac{k_{11}}{E} + \frac{k_{-12} k_4 H}{CEG} \right) \right]$$

$$k_e = \frac{k_{17}}{C} \left[ \frac{k_4 H}{G} + k_{12} \left( \frac{k_{11}}{E} + \frac{k_{-12} k_4 H}{CEG} \right) \right] + k_9 \frac{k_8 k_7}{ABC} \left[ \frac{k_4 H}{G} + k_{12} \left( \frac{k_{11}}{E} + \frac{k_{-12} k_4 H}{CEG} \right) \right]$$

$$k_f = k_{10} \frac{k_8 k_7}{ABC} \left[ \frac{k_4 H}{G} + k_{12} \left( \frac{k_{11}}{E} + \frac{k_{-12} k_4 H}{CEG} \right) \right] + k_{15} \frac{k_{13}}{D} \left( \frac{k_{11}}{E} + \frac{k_{-12} k_4 H}{CEG} \right)$$

$$k_g = k_{14} \frac{k_{13}}{D} \left( \frac{k_{11}}{E} + \frac{k_{-12}k_4H}{CEG} \right)$$

$$k_h = k_{16}$$

where

$$A = k_{-8} + k_9 + k_{10}$$

$$B = k_{-7} + k_8 - \frac{k_{-8}k_8}{A}$$

$$C = k_{-4} + k_5 + k_6 + k_7 + k_{-12} + k_{17} - \frac{k_{-7}k_7}{B}$$

$$D = k_{-13} + k_{14} + k_{15}$$

$$E = k_{-11} + k_{12} + k_{13} - \frac{k_{-13}k_{13}}{D} - \frac{k_{-12}k_{12}}{C}$$

$$F = \frac{k_{-4}k_{12}k_{-12}k_4}{C^2E}$$

$$G = k_{-2} + k_3 + k_4 - \frac{k_{-4}k_4}{C} - F$$

$$H = k_2 - \frac{k_{-4}k_{12}k_{11}}{CE}$$

## Moments of inertia

We list in the following table the moments of inertia of the different species (nomenclature is the same as figures 4 and 5)

|           | $I_x$      | $I_y$      | $I_z$     |
|-----------|------------|------------|-----------|
| I1        | 1193.24482 | 1366.24066 | 172.99583 |
| TS12      | 995.49589  | 1147.17729 | 193.75419 |
| I2        | 886.67005  | 1053.57113 | 176.47050 |
| TS-Caurea | 4789.74996 | 4940.40803 | 195.32315 |
| I4        | 1228.93498 | 1395.03437 | 176.05148 |
| I5        | 2027.05738 | 2027.05819 | 9.37091   |
| I6        | 901.17519  | 1054.80669 | 163.64409 |
| I7        | 1314.71574 | 1496.33263 | 191.71093 |
| I8        | 1899.14769 | 1980.68061 | 90.90100  |
| TS14      | 1292.75424 | 1435.25169 | 152.63944 |
| TS26      | 882.97310  | 1032.88317 | 178.62098 |
| TS46      | 1180.37308 | 1362.98012 | 192.49185 |
| TS67      | 1242.61093 | 1371.52970 | 208.55866 |
| TS78      | 1216.51335 | 1460.62832 | 253.65370 |
| TS45      | 1324.80884 | 1580.84352 | 265.58398 |
| TS1a      | 2036.71553 | 2180.37138 | 149.52077 |
| TS2a      | 1567.46849 | 1814.33958 | 256.22200 |
| TS6a      | 1677.04393 | 1966.80662 | 299.16193 |
| TS6b      | 1485.56321 | 1718.12189 | 241.99901 |
| k17-TS    | 1448.93537 | 1616.89627 | 177.95623 |
| k14-TS    | 3091.47747 | 3091.47747 | 9.44571   |
| k15-TS    | 6744.19776 | 6779.27460 | 44.44682  |

**Table S1.** Inertia moments in  $\text{amu}\cdot\text{bohr}^2$ .
